# Supplementary material for: Modulating the Li+/Ni2+ replacement and electrochemical performance optimizing of layered lithium-rich Li1.2Ni0.2Mn0.6O2 by minor Co dopant
Source: Royal Society of Chemistry journal article supplement (doi:10.1039/c4ta01217h), 2014-01-01
Supplement: c4ta01217h1.pdf [file c4ta01217h1.pdf]

**Modulating the Li<sup>+</sup>/Ni<sup>2+</sup> replacement and electrochemical performance optimizing of layered lithium-rich Li<sub>1.2</sub>Ni<sub>0.2</sub>Mn<sub>0.6</sub>O<sub>2</sub> by minor Co dopant**

Xiaolan Huang, Min Wang\* and Renchao Che\*

**Table S1** The transition metal composition ratio of the experimental and theoretic value for specimens z0, z2, z4, z10

|     | experimental(Mn: Ni: Co) | theoretic (Mn: Ni: Co) |
|-----|--------------------------|------------------------|
| z0  | 0.600 : 0.205            | 0.600 : 0.200          |
| z2  | 0.590 : 0.186 : 0.021    | 0.590 : 0.190 : 0.021  |
| z4  | 0.580 : 0.183 : 0.041    | 0.580 : 0.180 : 0.041  |
| z10 | 0.550 : 0.137 : 0.110    | 0.550 : 0.137 : 0.110  |

**Table S2** Magnetic parameters for the specimen z0, z2, z4, z10.

|     | Cp, <sup>a</sup> emu K/mol | θ <sub>p</sub> , <sup>a</sup> K | μ <sub>exp</sub> , <sup>a</sup> μ <sub>B</sub> | μ <sub>theor</sub> , <sup>b</sup> μ <sub>B</sub> | M <sub>s</sub> , emu/mol | Ni <sup>2+</sup> (3b) |
|-----|----------------------------|---------------------------------|------------------------------------------------|--------------------------------------------------|--------------------------|-----------------------|
| z0  | 1.280                      | -27.4                           | 3.19                                           | 3.25                                             | 470.2                    | 3.83%                 |
| z2  | 1.265                      | -26.6                           | 3.15                                           | 3.22                                             | 292.3                    | 2.38%                 |
| z4  | 1.250                      | -26.1                           | 3.13                                           | 3.18                                             | 250.79                   | 2.04%                 |
| z10 | 1.142                      | -22.4                           | 2.99                                           | 3.07                                             | 141.42                   | 1.15%                 |

<sup>a</sup> The Cp, θ<sub>p</sub>, μ<sub>exp</sub> are calculated from Curie-Weiss law: H/M=(T-θ<sub>p</sub>)/Cp, and the relation Cp=N μ<sub>exp</sub><sup>2</sup>/(3k<sub>B</sub>)

<sup>b</sup> The theoretical magnetic moments μ<sub>theor</sub> is got by assuming Mn<sup>4+</sup>(S=3/2), Ni<sup>2+</sup>(S=1) and Co<sup>3+</sup>(S=0, LS)

**Table S3** Fitting parameters for the EIS spectrum

|     | R <sub>e</sub> (Ω) | R <sub>s</sub> (Ω) | R <sub>ct</sub> (Ω) | D <sub>Li+</sub> (cm <sup>2</sup> s <sup>-1</sup> ) |
|-----|--------------------|--------------------|---------------------|-----------------------------------------------------|
| z0  | 6.293              | 821                | 1981                | 2.11E-16                                            |
| z2  | 14.7               | 422.8              | 722.9               | 1.29E-15                                            |
| z4  | 3.902              | 119.4              | 134.7               | 5.41E-15                                            |
| z10 | 8.967              | 206.5              | 293.7               | 4.01E-15                                            |

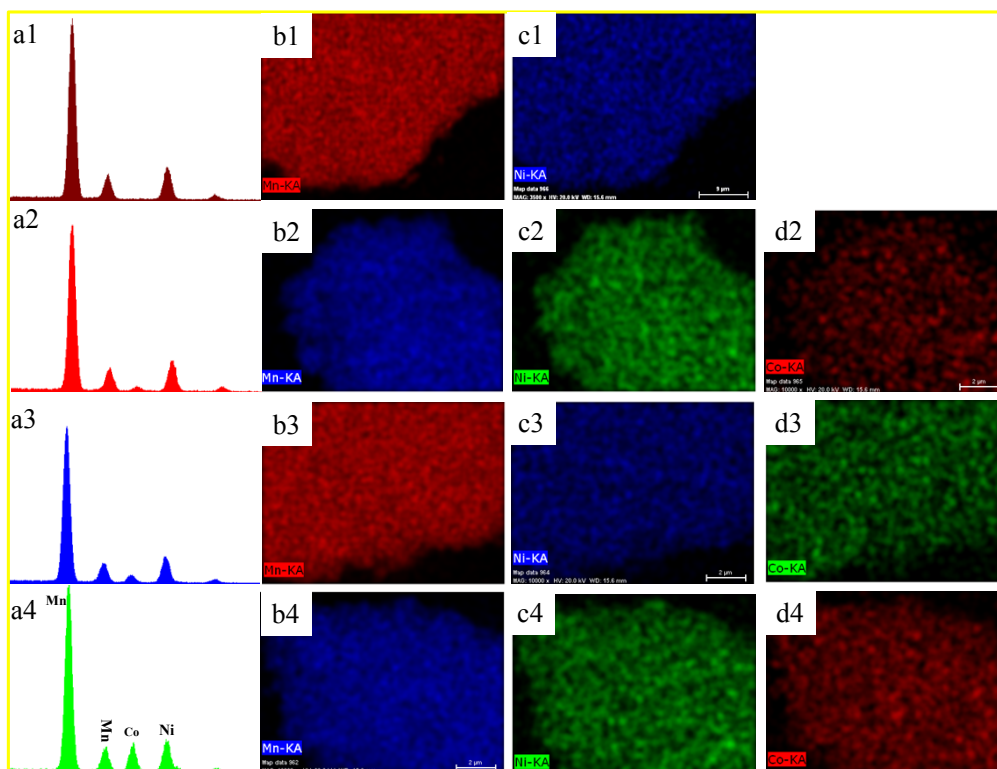

**Fig. S1** Energy dispersive X-ray (EDX) spectroscopy of all the specimens z0(1), z2(2), z4(3), z10(4): (a) Intensity plots and (b ~d) EDX mapping for Mn (b1~b4), Ni(c1~c4), Co(d2~d4)

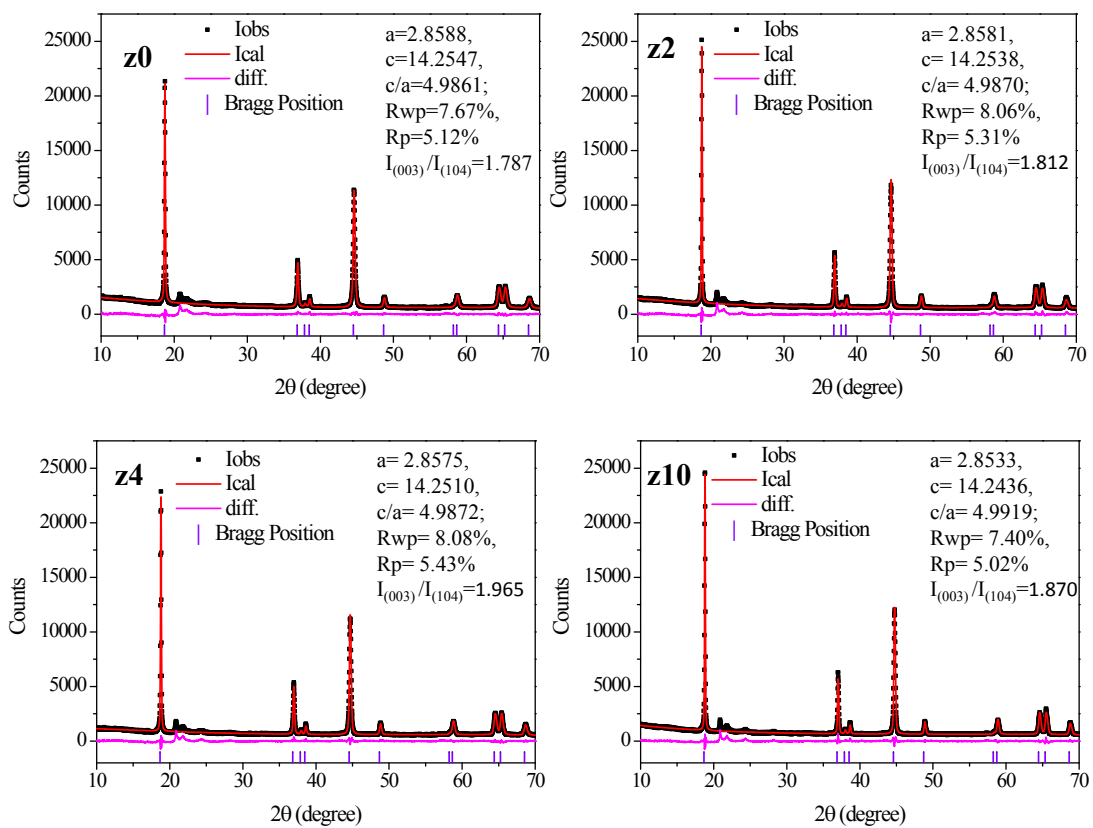

Fig. S2 XRD refinement results for the specimens for z0, z2, z4, z10 by using the TOPAS software.

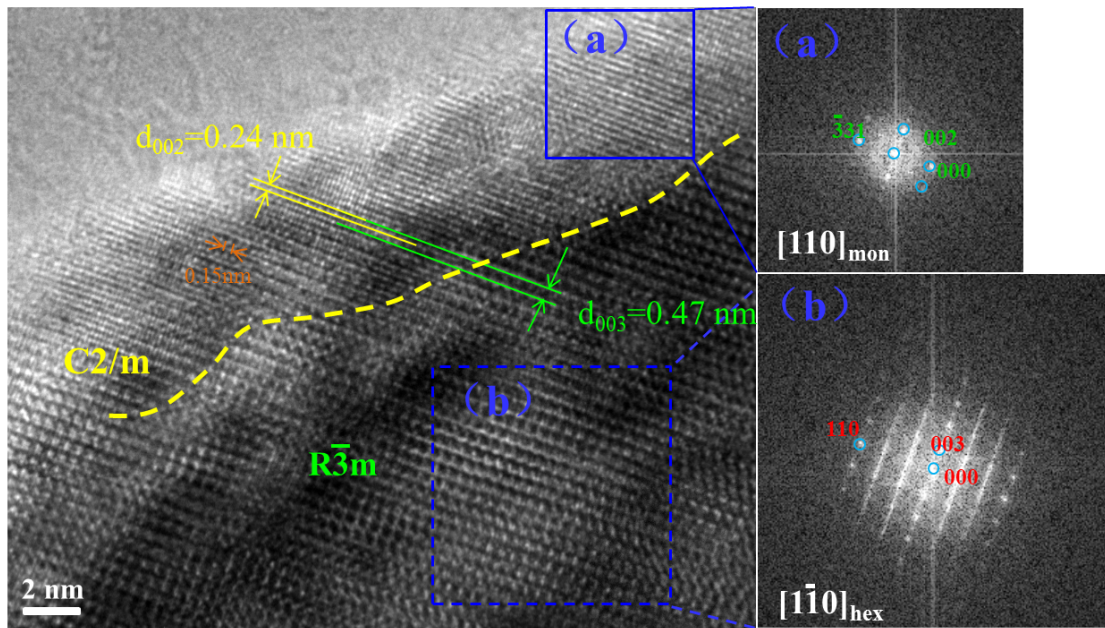

**Fig.S3** HRTEM images for specimen z0 and FFT(Fast Fourier Transformed ) images for the regions indicted by blue box(a) at the margin and blue dotted box(b) inside the particle. The miller indexes are denoted according to the C2/m space group(green) and the R $\bar{3}$ m space group (red).

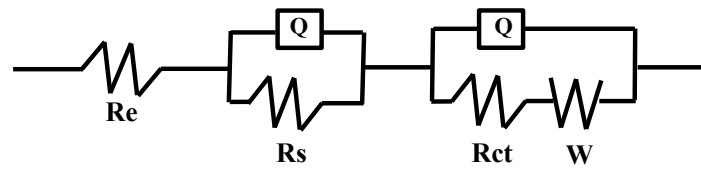

**Fig.S4** Equivalent circuit used in the EIS fitting

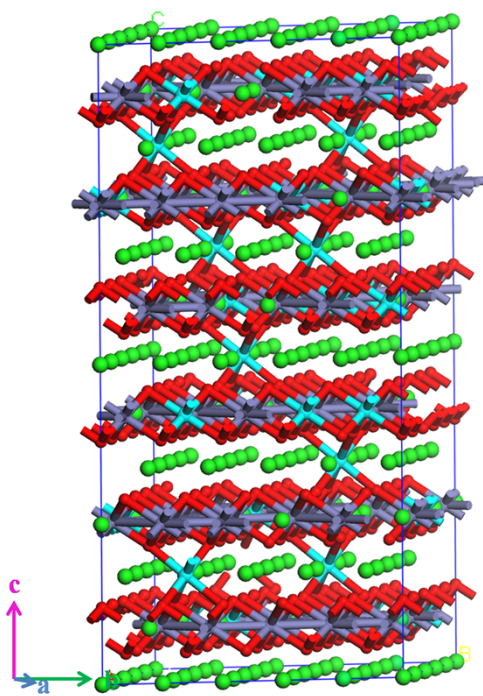

**z0**

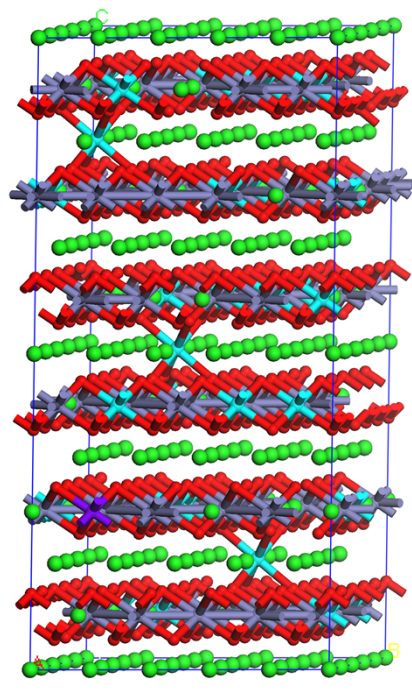

**z4**

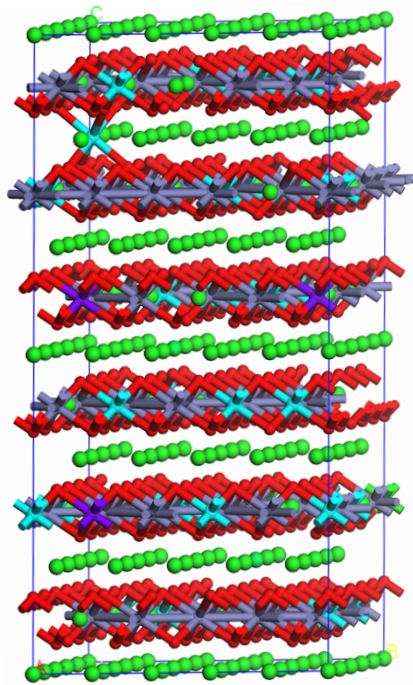

**z10**

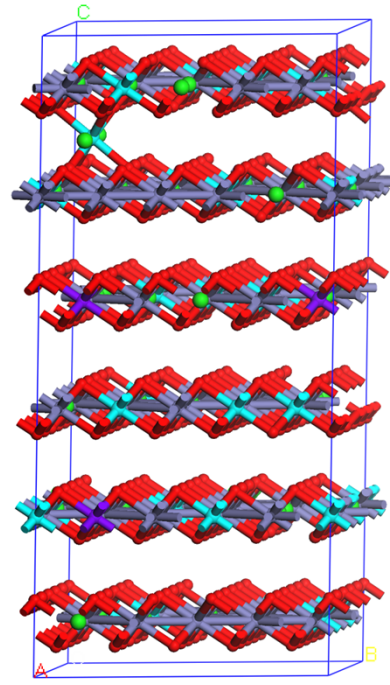

**z10**  
**delithiated**

Fig.S5 Ball-and-stick models for the specimen z0, z4, z10 and the delithiated state of z10.
